# Supplementary material
Source: PubMed Central journal article supplement (PMC4374061)
Supplement: NIHMS629995-supplement-supplemental_file.pdf [file NIHMS629995-supplement-supplemental_file.pdf]

## ECG Interpretation

Normal or acceptable variant – no further evaluation or testing needed

Abnormal – further evaluation or testing needed

If abnormal, please check why:

|                          |                                    |                                                                                                                                                                |
|--------------------------|------------------------------------|----------------------------------------------------------------------------------------------------------------------------------------------------------------|
| <input type="checkbox"/> | T wave Inversion                   | > 1 mm in depth from baseline in two or more adjacent leads not including aVR or V <sub>1</sub>                                                                |
| <input type="checkbox"/> | ST Segment Depression              | ≥ 1 mm in depth in two or more adjacent leads                                                                                                                  |
| <input type="checkbox"/> | Pathologic Q waves                 | > 3 mm in depth or > 0.04 sec in duration in two or more leads                                                                                                 |
| <input type="checkbox"/> | Complete Left Bundle Branch Block  | QRS > 0.12 sec, predominantly negative QRS complex in lead V <sub>1</sub> (QS or rS), and upright monophasic R wave in leads I and V <sub>6</sub>              |
| <input type="checkbox"/> | Complete Right Bundle Branch Block | QRS > 0.12 sec, terminal R wave in lead V <sub>1</sub> (rSR'), and wide terminal S wave in leads I and V <sub>6</sub>                                          |
| <input type="checkbox"/> | Intra-Ventricular Conduction Delay | Non-specific, QRS > 0.12 sec                                                                                                                                   |
| <input type="checkbox"/> | Left Atrial Enlargement            | Prolonged P wave duration of > 0.12 sec in leads I or II with negative portion of the P wave ≥ 1 mm in depth and ≥ 0.04 sec in duration in lead V <sub>1</sub> |
| <input type="checkbox"/> | Left Axis Deviation                | -30° to -90°                                                                                                                                                   |
| <input type="checkbox"/> | Right Atrial Enlargement           | High/pointed P wave ≥ 2.5 mm in leads II and III or V <sub>1</sub>                                                                                             |
| <input type="checkbox"/> | Right Ventricular Hypertrophy      | Right axis deviation ≥ 120°, tall R wave in V <sub>1</sub> + persistent precordial S waves (R-V <sub>1</sub> + S-V <sub>5</sub> > 10.5 mm)                     |
| <input type="checkbox"/> | Mobitz Type II 2° AV Block         | Intermittently non-conducted P waves not preceded by PR prolongation and not followed by PR shortening                                                         |
| <input type="checkbox"/> | 3° AV Block                        | Complete heart block                                                                                                                                           |
| <input type="checkbox"/> | Ventricular Pre-excitation         | PR interval < 0.12 sec with a delta wave (slurred upstroke in the QRS complex )                                                                                |
| <input type="checkbox"/> | Long QT interval                   | QTc ≥ 0.47 sec (99% males)<br>QTc ≥ 0.48 sec (99% females)<br>[QTc ≥ 0.50 sec (unequivocal LQTS)]                                                              |
| <input type="checkbox"/> | Short QT interval                  | QTc ≤ 0.34 sec                                                                                                                                                 |
| <input type="checkbox"/> | Brugada-like ECG Pattern           | High take-off and downsloping ST segment elevation in V <sub>1</sub> -V <sub>3</sub>                                                                           |
| <input type="checkbox"/> | Epsilon Wave                       | Small negative deflection just beyond the QRS in V <sub>1</sub> or V <sub>2</sub>                                                                              |
| <input type="checkbox"/> | Profound Sinus bradycardia         | < 30 BPM or sinus pauses ≥ 3 sec                                                                                                                               |
| <input type="checkbox"/> | Atrial Tachyarrhythmias            | Supraventricular tachycardia, atrioventricular nodal reentrant tachycardia, , atrial-fibrillation, atrial-flutter                                              |
| <input type="checkbox"/> | Premature Ventricular Contractions | ≥ 2 per tracing                                                                                                                                                |
| <input type="checkbox"/> | Ventricular Arrhythmias            | Couplets, triplets, non-sustained ventricular tachycardia                                                                                                      |
| <input type="checkbox"/> | Other: (please specify)            |                                                                                                                                                                |
